# Supplementary material for: Modular metallotecton for engineering permanently porous frameworks: supernumerary role of ancillary ion
Source: Royal Society of Chemistry journal article supplement (doi:10.1039/d3sc02068a), 2023-01-01
Supplement: d3sc02068a1.pdf [file d3sc02068a1.pdf]

***Supporting Information for:***

**Modular Metallotecton for Engineering Porous Supramolecular Frameworks: Supernumerary Role of Ancillary Ion**

Deepak Gupta, Géraldine Chanteux, Gulshan Kumar<sup>1</sup>, Koen Robeyns and Alexandru Vlad\*.

*Institute of Condensed Matter and Nanosciences, Molecular Chemistry, Materials and Catalysis, Université catholique de Louvain, Louvain-la-Neuve B-1348, Belgium*

*<sup>1</sup>Present Address: Fraunhofer Institute of Interfacial Engineering and Biotechnology IGB, Bio-, Electro-, and Chemocatalysis BioCat, Straubing Branch, Schulgasse 11a, 94315, Straubing, Germany*

Email: [alexandru.vlad@uclouvain.be](mailto:alexandru.vlad@uclouvain.be)

## Table of Content

1. Material and Methods
2. Scheme S1: Synthetic route to **1.Cl**.
3. Scheme S2: Synthetic route to **1.Br**.
4. Scheme S3: Synthetic route to **1.Li**.
5. Crystallization procedures, exchange and inclusion studies
6. Figure S1: FTIR spectra of [Ru(1,10-phenanthroline-5,6-dione)<sub>3</sub>].2Cl (a), **1.Cl** (b) **1.Br** (c) and **1.Li** (d). The peak corresponding to the C=O group is highlighted in grey.
7. Figure S2: Partial <sup>1</sup>H NMR spectra of complexes (a) [Ru(1,10-phenanthroline-5,6-dione)<sub>3</sub>].2Cl (a), **1.Cl** (b) and **1.Br** (c) in DMSO-*d*<sub>6</sub>.
8. Figure S3: Partial <sup>1</sup>H NMR (400 MHz) spectrum of **1.Li** in CD<sub>3</sub>OD.
9. Table S1. Crystal data and structure refinement parameters for **1.Cl**, **1.Br** and **1.Li**.
10. Figure S4: The various bond length parameters in one unit of **1.Cl**, **1.Br** and **1.Li**.
11. Figure S5: (Top) The 3 possible conformations for the Ru complex in **1.Cl**. (Bottom) the occupancy of the hydrogens in the crystal structure.
12. Figure S6: H-bonded network in one layer of **1.Cl** consisting of [Ru(5,6-dihydroxy-1,10-phenanthroline)<sub>2</sub>(5-oxido-6-hydroxy-1,10-phenanthroline)]<sup>+</sup> cations and Cl<sup>-</sup> anions (green ball) highlighting hexagonal pores.
13. Figure S7: One Cl<sup>-</sup> anion holding three coordination complex units at nearly 1.008 Å above the basal plane formed by three H-bonded oxygen atoms.
14. Figure S8: Comparison of powder XRD patterns of bulk powder of **1.Cl** with the corresponding simulated diffractogram from single-crystal data.
15. Figure S9: Comparison of XRD patterns of bulk powder of **1.Br** with the corresponding simulated diffractogram from single-crystal data.
16. Figure S10: H-bonded network in one layer of **1.Br** consisting of [Ru(5,6-dihydroxy-1,10-phenanthroline)<sub>2</sub>(5-oxido-6-hydroxy-1,10-phenanthroline)]<sup>+</sup> cations and bromide anions (brown ball) highlighting distorted hexagonal pores.
17. Figure S11: Stereochemistry around the Ru(II) ions in the complex and anions in **1.Cl** (left) and **1.Br** (right).
18. Figure S12: Hydrogen bond interactions in **1.Br** involving the Br (Br61/Br62) anions and water molecules (O61B/O62B and O63) with the occupancies.
19. Figure S13: Tetragonal geometry around Li (purple) in **1.Li** involving three C-O groups and one DMF molecule. The OH groups hydrogen bond to neighboring C-O groups.

20. Figure S14: H-bonded network in one layer of **1.Li** consisting of [Ru(5-oxido-6-hydroxy-1,10-phenanthroline)<sub>3</sub>] anion and Li<sup>+</sup> cations (pink ball) highlighting distorted hexagonal pores.
21. Figure S15: A topological stack of two 2D layers showing hexagonal (**6<sup>3</sup>**) net of **1.Cl** (left), **1.Br** (center) and **1.Li** (right).
22. Figure S16: Aromatic stacking interactions between adjacent molecules of **1.Cl** (A), **1.Br** (B) and **1.Li** (C).
23. Figure S17: Thermogravimetric (TGA) profile showing the decomposition of **1.Cl** in the temperature range from 20°C to 900°C.
24. Figure S18: Thermogravimetric (TGA) profile showing the decomposition of **1.Br** in the temperature range from 20°C to 900°C.
25. Figure S19: Comparative PXRD patterns of **1.Br** (red), after D<sub>2</sub>O exchange (orange) and after iodine exchange (black).
26. SI-References

## Material and Methods

All following chemicals were purchased and used as received.  $\text{RuCl}_3 \cdot x\text{H}_2\text{O}$  (40-43% Ru) was purchased from Strem Chemicals. 1,10-phenanthroline (98%), ammonium hexafluorophosphate (99%) and nitric acid (65%) were purchased from Fluorochem. Absolute ethanol and chloroform stabilized with ~0.6% ethanol were purchased from VWR. Potassium bromide (99+%) was purchased from Alfa Aesar. Methanol (99.8%) extra dry over molecular sieve, N,N-dimethylformamide (99.8%) extra dry over molecular sieve and tetrabutylammonium bromide (99+%) were purchased from Thermoscientific. Dithiooxamide (97%), lithium methoxide (98%) and anhydrous dimethyl sulfoxide (>99.9%) were purchased from Sigma Aldrich. The synthesis of 1,10-phenanthroline-5,6-dione,  $\text{Ru}(\text{DMSO})_4\text{Cl}_2$  and  $[\text{Ru}(1,10\text{-phenanthroline-5,6-dione})_3] \cdot 2\text{Cl}$  were performed using reported procedures.<sup>1-5</sup>

FTIR spectroscopy was carried out on a Bruker Alpha P spectrometer with a single reflection ATR module.  $^1\text{H}$  NMR and  $^{13}\text{C}$  NMR spectra were recorded on a Bruker Avance II 300 spectrometer (at 300 and 75 MHz, respectively) at 298 K. Chemical shifts are given in ppm relative to TMS. Single X-ray diffraction data were recorded on an MAR345 image plate, using Mo  $\text{K}\alpha$  radiation ( $\lambda = 0.71073 \text{ \AA}$ ) generated by an Incoatec microfocus source (Montel optics). Data integration and reduction was performed by CrysAlis<sup>PRO</sup> Software System1, Version 1.171.37.35. Rigaku Oxford Diffraction and the implemented absorption correction was applied.<sup>6,7</sup> The structure was solved by SHELXT and refined by least-squares against  $F^2$  by shelxt2018/3.<sup>8,9</sup> All non-hydrogen atoms were refined anisotropically and hydrogens were placed at calculated positions and refined in riding mode with temperature factors set at 1.2 Ueq of the parent atoms (1.5 for methyl groups). Void cavities were treated by the Squeeze algorithm as implemented in PLATON (Spek). **1.Cl** was refined as twinned by inversion, with a refined twin fraction of 50%. For **1.Br** and **1.Li** a resolution cut-off to 0.9 $\text{\AA}$  and 1  $\text{\AA}$ , respectively, was imposed during integration. In **1.Br** the bromide anion is found disordered over two sites and competes with a water molecule resulting in two mixed sites Br/H<sub>2</sub>O in a 75/25 and 25/75 ratio respectively. **1.Li** was also found to be twinned and was refined against HKLF5 formatted reflection data. For both **1.Br** and **1.Li**, due to the restricted resolution of the data, overall isotropic and rigid bond restraints were applied.

Powder X-ray diffraction data were recorded using a STOE Stadi P diffractometer equipped with a Mo anticathode ( $\text{K}\alpha$  radiation, 0.71073  $\text{\AA}$ ; 50 kV, 40 mA) in the range of  $2\theta = 1\text{-}50^\circ$ , with a step size of  $1^\circ$  and 50 s acquisition time per step.

Thermogravimetric analyses (TGA) were performed on a TGA/DSC 3+ from Mettler

Toledo equipped with a LF1100 oven (1100°C) and a GC 401 gas controller (air and N<sub>2</sub>). The samples (2-4 mg) were weighed and placed into 70 µL alumina containers. They were heated at 10 °C/min from 25°C to 850°C under nitrogen flow (100 mL/min).

## Synthetic procedures

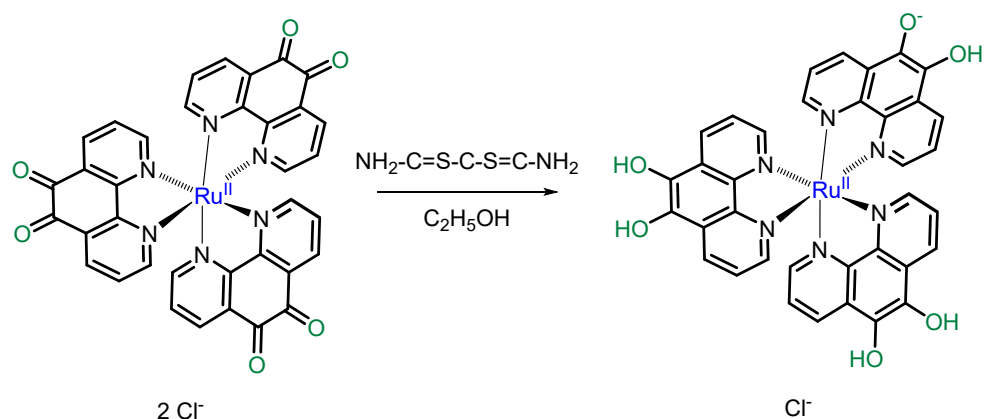

**Scheme S1:** Synthetic route to **1.Cl**.

$[\text{Ru}(\text{1,10-phenanthroline-5,6-dione})_2] \cdot 2\text{Cl}$  (0.3 mmol) and dithiooxamide (2.4 mmol) were suspended in ethanol (20 mL) in a 50 mL flask. The reaction mixture was bubbled with argon for 15 minutes and allowed to reflux for 24 hrs in dark under argon. The appearance of bright orange powder on the walls was indicative of product formation. After cooling the reaction to RT, the orange powder was filtered, and washed with fresh diethyl ether (10 mL) under argon. The product was dried in vacuo at  $70^\circ\text{C}$  overnight, under dark. Yield (89%).

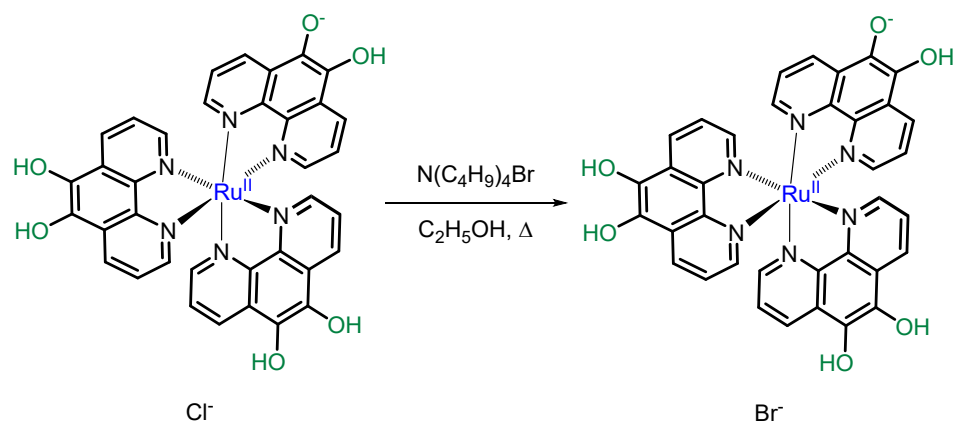

**Scheme S2:** Synthetic route to **1.Br**.

Under argon atmosphere,  $[\text{Ru}(1,10\text{-phenanthroline-5,6-diol})_3] \cdot 2\text{Cl}$  (0.6 mmol) was dissolved in 50 ml ethanol in a 100 ml flask followed by the addition of ethanolic solution of tetrabutylammonium bromide (0.7 mmol). The reaction mixture was bubbled with argon for 15 minutes and allowed to reflux overnight. The dark brown powder was washed three times with dry ether, transferred in the glove box and dried at  $100^\circ\text{C}$  for 12 hours. Yield (84%).

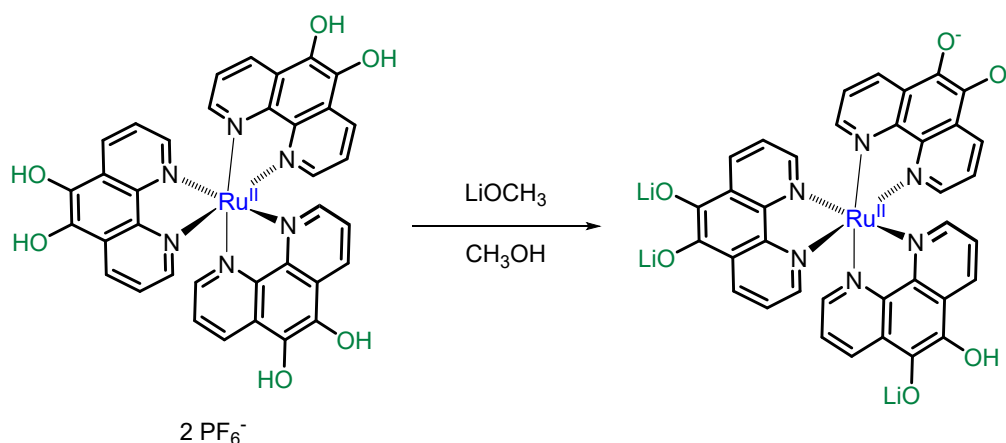

**Scheme S3:** Synthetic route to **1.Li**.

Lithium methoxide (1.6 mmol) was dissolved in 20 mL of dry methanol under argon. To this,  $[\text{Ru}(5,6\text{-dihydroxy-}1,10\text{-phenanthroline})_3] \cdot 2\text{PF}_6$  (0.2 mmol) was added in portions with stirring to obtain a dark brown clear solution at RT. This was left for stirring for 2 days under dark. The dark brown product was precipitated by adding the reaction mixture to diethyl ether (50 mL). The product was centrifuged, washed with diethyl ether and dried in vacuo at  $70^\circ\text{C}$  overnight under dark. Yield (93%).

*Note:*  $[\text{Ru}(5,6\text{-dihydroxy-}1,10\text{-phenanthroline})_3] \cdot 2\text{PF}_6$  can be directly obtained from  $[\text{Ru}(5,6\text{-dihydroxy-}1,10\text{-phenanthroline})_3] \cdot 2\text{Cl}$  by anion exchange method.



## Crystallization procedures

Single crystals of **1.Cl** and **1.Br** were grown by dissolving the complexes in methanol at RT under argon atmosphere. The orange saturated solution was passed through a 5  $\mu\text{m}$  filter to remove any aggregates. A 1 mL aliquot of the solution was kept in a transparent vial (3 mL) which was placed in another vial (30 mL) containing 5 mL of diethyl ether to allow slow diffusion of ether into the methanolic solution. The vial was tightly capped and left undisturbed for one week in the dark. Orange colored, needle-shaped crystals, suitable for single crystal analysis, were observed on the walls.

Single crystals of **1.Li** were obtained by dissolving  $\text{Li}_4[\text{Ru}(1,10\text{-phenanthroline-5,6-dioxide})]$  in anhydrous methanol under inert atmosphere. The brown saturated solution was passed through a 5  $\mu\text{m}$  filter to remove any aggregates. A 1 mL aliquot of this solution was layered over 1 mL of DMF in a 3 mL vial which was tightly capped and left undisturbed for three weeks. The layers were found to be mixed completely to give a clear brown solution. The vial cap was unscrewed slightly and allowed the solvent to evaporate slowly. At an optimum concentration, shiny block like crystals started to appear in the solution. A small amount of mother liquid with single crystals was pipetted in paratone® oil to avoid decomposition, prior to flash cooling in a 120K or 150K  $\text{N}_2$  stream.

## Exchange and inclusion studies

The weighed amount of compounds **1.Cl** and **1.Br** were heated up to 80  $^\circ\text{C}$  under vacuum for 6 hrs to remove residual solvent molecules. Subsequently, the desolvated compounds were allowed to equilibrate in a sealed environment of  $\text{D}_2\text{O}$  and  $\text{I}_2$  vapors separately.

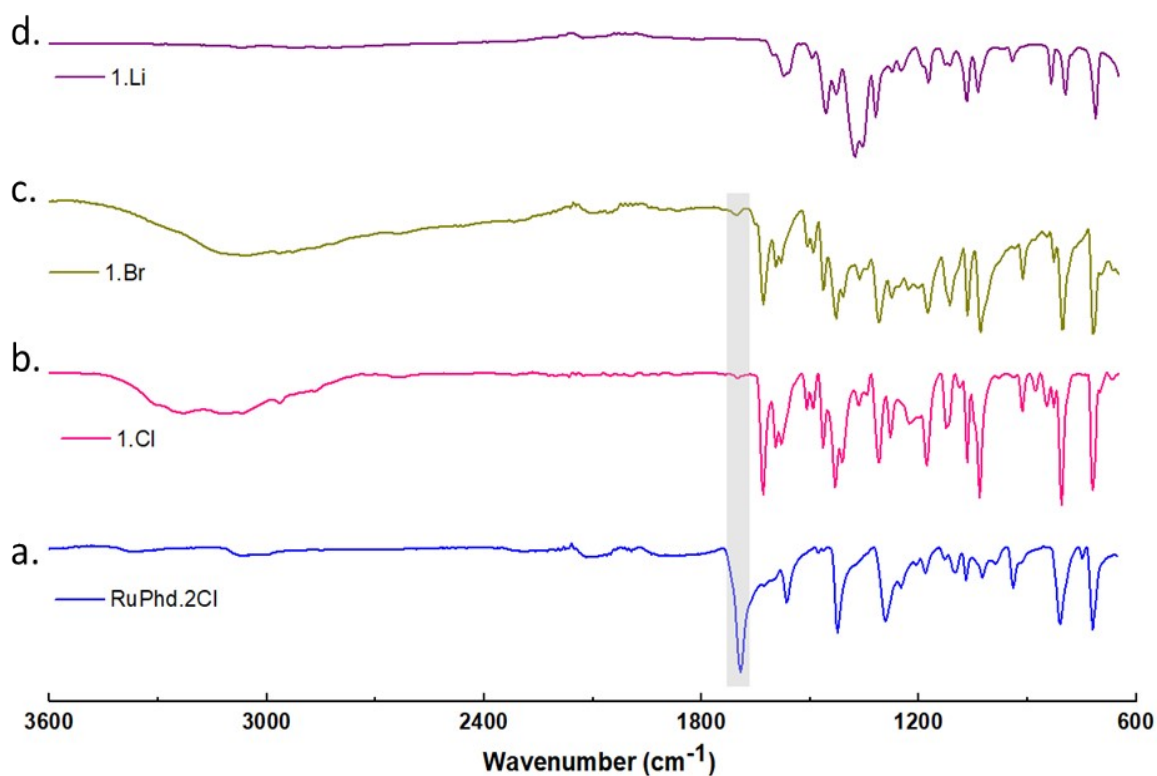

**Figure S1:** FTIR spectra of  $[\text{Ru}(1,10\text{-phenanthroline-5,6-dione})_3].2\text{Cl}$  (a), **1.Cl** (b) **1.Br** (c) and **1.Li** (d). The band corresponding to the C=O group is highlighted in grey.

The FTIR spectrum of the three supramolecular frameworks (**1.Cl**, **1.Br** and **1.Li**) as well as the starting material  $[\text{Ru}(1,10\text{-phenanthroline-5,6-dione})_3].2\text{Cl}$  were recorded in solid state; wherein the disappearance of the intense carbonyl band at  $1694\text{ cm}^{-1}$  and appearance of a broad band in the region  $3000\text{-}3300\text{ cm}^{-1}$  (in **1.Cl** and **1.Br**) confirmed the product formation. No other significant change was observed.

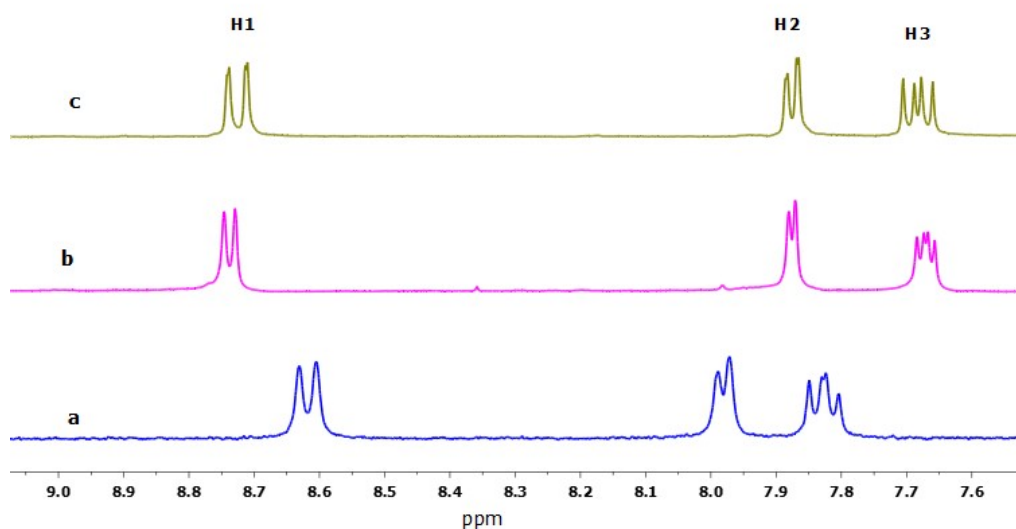

**Figure S2:** Selected region  $^1\text{H}$  NMR of the complexes (a)  $[\text{Ru}(1,10\text{-phenanthroline-5,6-dione})_3]\cdot 2\text{Cl}$  (a), **1.Cl** (b) and **1.Br** (c) in  $\text{DMSO-}d_6$ .

The  $^1\text{H}$  NMR spectra (400 MHz) of the starting complex  $[\text{Ru}(1,10\text{-phenanthroline-5,6-dione})_3]\cdot 2\text{Cl}$  and **1.Cl** and **1.Br** were recorded in  $\text{DMSO-}d_6$ . The spectra established the product formation by increase in separation of the signals attributed to the aromatic protons. The shift in peak position is because of alteration in the electronic arrangement in the ligand framework upon reduction of the carbonyl groups to hydroxyl groups.

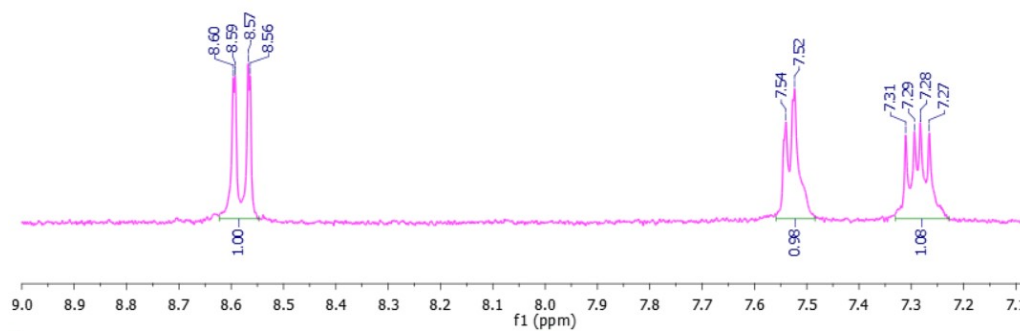

**Figure S3:** Selected region  $^1\text{H}$  NMR (400 MHz) spectrum of **1.Li** in  $\text{CD}_3\text{OD}$ .

The  $^1\text{H}$  NMR spectra (400 MHz) of **1.Li** was performed in  $\text{CD}_3\text{OD}$  which displayed three distinct signals for the three aromatic protons on the phenanthroline ligand confirming the product formation as well as high purity of the final lithiated product. The sample was prepared under inert atmosphere and protected from stray light to avoid degradation of the product.

**Table S1:** Crystal data and structure refinement parameters for **1.Cl**, **1.Br** and **1.Li**.

| Identification code               | <b>1.Cl</b>                                       | <b>1.Br</b>                                       | <b>1.Li</b>                                       |
|-----------------------------------|---------------------------------------------------|---------------------------------------------------|---------------------------------------------------|
| Empirical formula                 | C36 H23 Cl N6 O12 Ru                              | C36 H23 Br N6 O8 Ru                               | C45 H39 Li N9 O9 Ru                               |
| Formula weight                    | 868.12                                            | 848.58                                            | 957.86                                            |
| Temperature                       | 120(2) K                                          | 150(2) K                                          | 150(2) K                                          |
| Wavelength                        | 0.71073 Å                                         | 0.71073 Å                                         | 0.71073 Å                                         |
| Crystal system                    | Trigonal                                          | Monoclinic                                        | Monoclinic                                        |
| Space group                       | <i>P</i> 31 <i>c</i>                              | <i>P</i> 2 <sub>1</sub> / <i>n</i>                | <i>P</i> 2 <sub>1</sub> / <i>n</i>                |
| Unit cell dimensions              | <i>a</i> = 16.0468(4) Å                           | <i>a</i> = 9.5706(5) Å                            | <i>a</i> = 13.2103(17) Å                          |
|                                   | <i>b</i> = <i>a</i>                               | <i>b</i> = 27.2115(13) Å                          | <i>b</i> = 12.687(2) Å                            |
|                                   | <i>c</i> = 9.8253(3) Å                            | <i>c</i> = 16.1676(10) Å                          | <i>c</i> = 25.365(4) Å                            |
|                                   |                                                   | β = 90.702(5)°                                    | β = 99.389(14)°                                   |
| Volume                            | 2191.05(13) Å <sup>3</sup>                        | 4210.2(4) Å <sup>3</sup>                          | 4194.3(11) Å <sup>3</sup>                         |
| Z                                 | 2                                                 | 4                                                 | 4                                                 |
| Density (calculated)              | 1.316 mg/m <sup>3</sup>                           | 1.339 mg/m <sup>3</sup>                           | 1.517 mg/m <sup>3</sup>                           |
| Absorption coefficient            | 0.480 mm <sup>-1</sup>                            | 1.372 mm <sup>-1</sup>                            | 0.444 mm <sup>-1</sup>                            |
| F(000)                            | 876                                               | 1696                                              | 1964                                              |
| Crystal size                      | 0.25 x 0.04 x 0.03 mm <sup>3</sup>                | 0.50 x 0.05 x 0.04 mm <sup>3</sup>                | 0.06 x 0.04 x 0.01 mm <sup>3</sup>                |
| θ range for data collection       | 3.591 to 25.240°                                  | 2.256 to 23.256°                                  | 2.922 to 20.965°                                  |
| Reflections collected             | 11889                                             | 20916                                             | 4357                                              |
| Independent reflections           | 2637 [R <sub>(int)</sub> = 0.0469]                | 5860 [R <sub>(int)</sub> = 0.1129]                | 4357 [R <sub>(int)</sub> = 0]*                    |
| Completeness 2θ = 25.240°         | 99.5 %                                            | 97.0 %                                            | 97.0 %                                            |
| Absorption correction             | Semi-empirical from equivalents                   | Semi-empirical from equivalents                   | Semi-empirical from equivalents                   |
| Max. and min. transmission        | 1.00000 and 0.71516                               | 1.00000 and 0.84305                               | 1.00000 and 0.74138                               |
| Refinement method                 | Full-matrix least-squares on F <sup>2</sup>       | Full-matrix least-squares on F <sup>2</sup>       | Full-matrix least-squares on F <sup>2</sup>       |
| Data / restraints / parameters    | 2637 / 1 / 170                                    | 5860 / 438 / 476                                  | 4357 / 488 / 544                                  |
| Goodness-of-fit on F <sup>2</sup> | 1.087                                             | 1.023                                             | 1.068                                             |
| Final R indices [I>2σ(I)]         | R <sub>1</sub> = 0.0613, wR <sub>2</sub> = 0.1505 | R <sub>1</sub> = 0.0717, wR <sub>2</sub> = 0.1709 | R <sub>1</sub> = 0.1210, wR <sub>2</sub> = 0.2421 |
| R indices (all data)              | R <sub>1</sub> = 0.0635, wR <sub>2</sub> = 0.1520 | R <sub>1</sub> = 0.1254, wR <sub>2</sub> = 0.1990 | R <sub>1</sub> = 0.2020, wR <sub>2</sub> = 0.2834 |
| Δρ (max, min)                     | 1.619 and -0.462 e.Å <sup>-3</sup>                | 0.975 and -0.499 e.Å <sup>-3</sup>                | 1.267 and -0.897 e.Å <sup>-3</sup>                |
| CCDC No.                          | 2143383                                           | 2143384                                           | 2143385                                           |

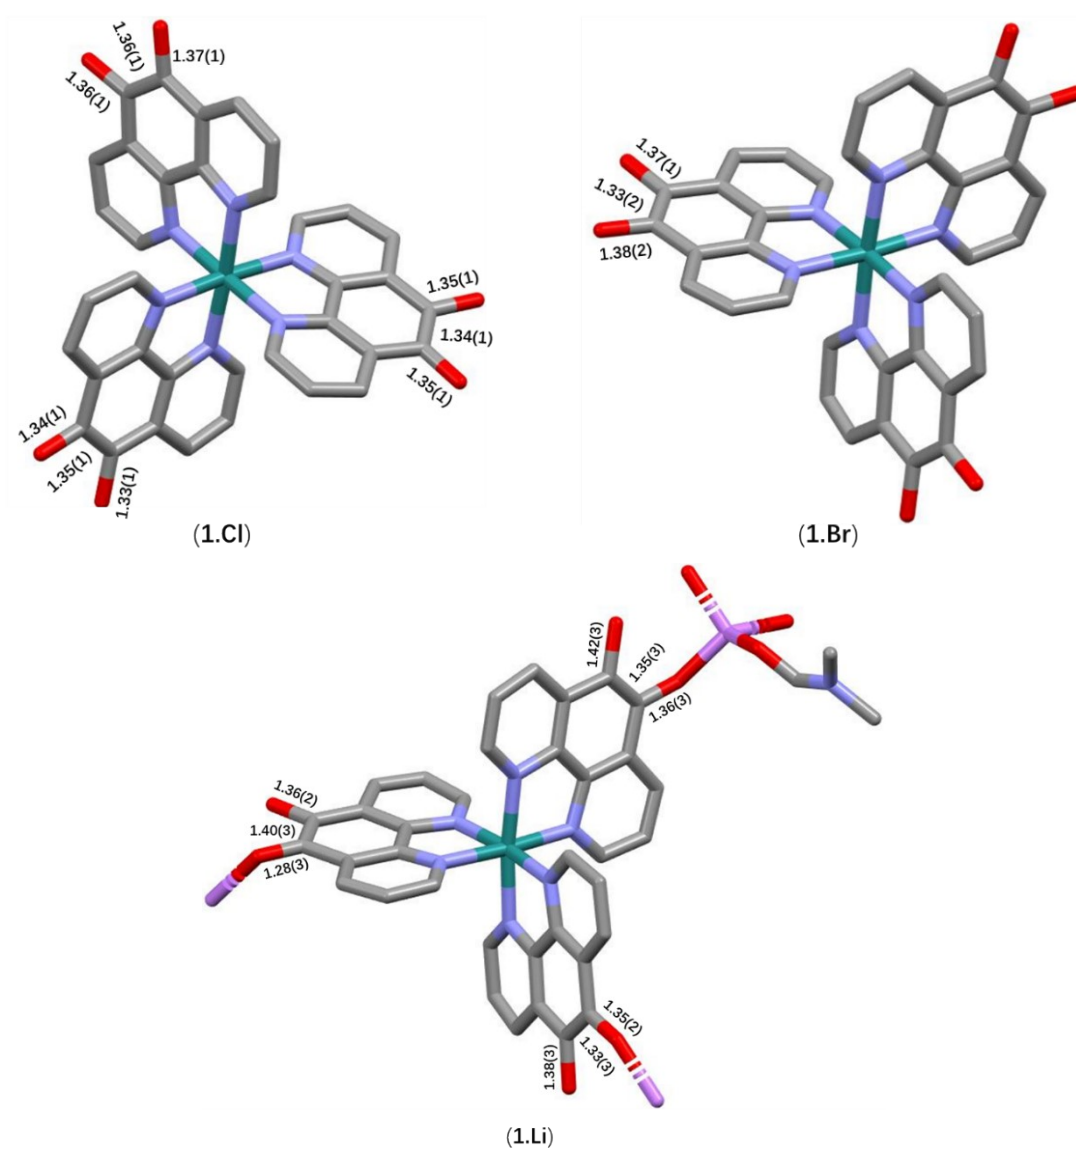

**Figure S4:** The various bond length parameters in one unit of **1.Cl**, **1.Br** and **1.Li**.

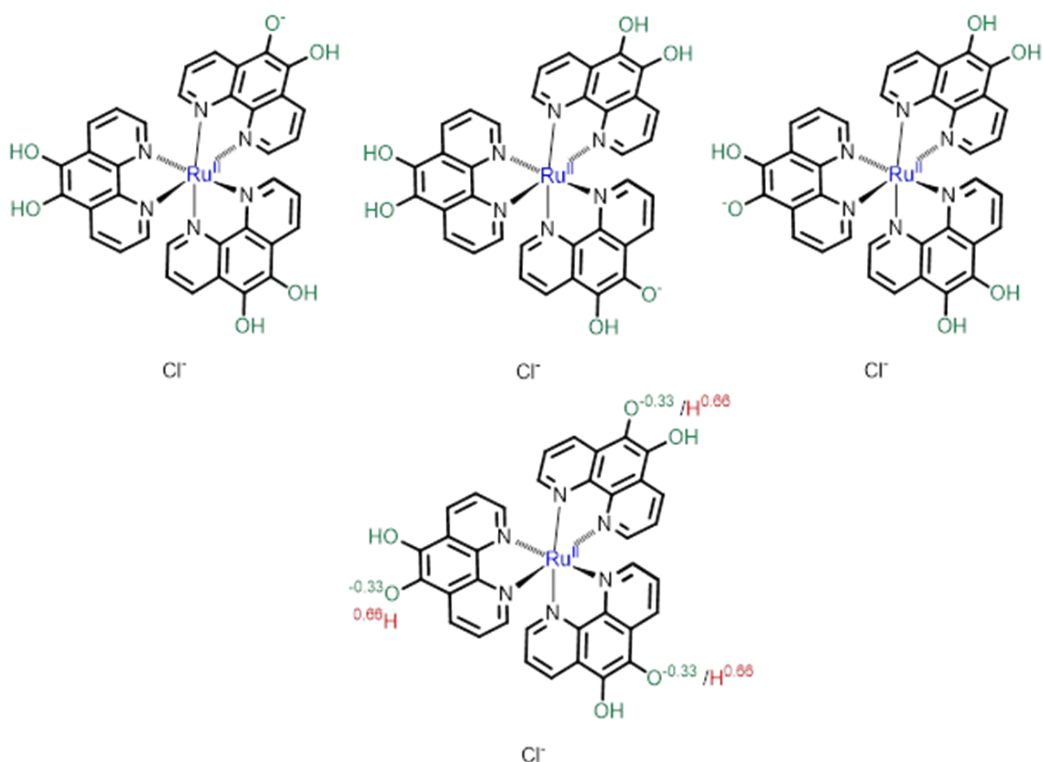

**Figure S5:** (top) The 3 possible conformations for the Ru complex in **1.Cl**. (Bottom) the occupancy of the hydrogens in the crystal.

In **1.Cl** both the Cl<sup>-</sup> anion as well as the Ru complex cation are found on a 3-fold axis. This implies that the overall positive charge of the Ru(II)-complex is achieved by one negative charge on one of the coordinating ligands which can be represented by the chemical formula RuL<sub>2</sub>L<sup>-</sup>. Crystallographically, all the three ligands are equivalent and the negative charge is assumed to be distributed over the whole Ru-complex unit. This can be explained by constraining the occupancy of the hydrogen atom which is not involved in a hydrogen bond with Cl<sup>-</sup> at 0.66, or one O<sup>-</sup> out of the six OH groups.

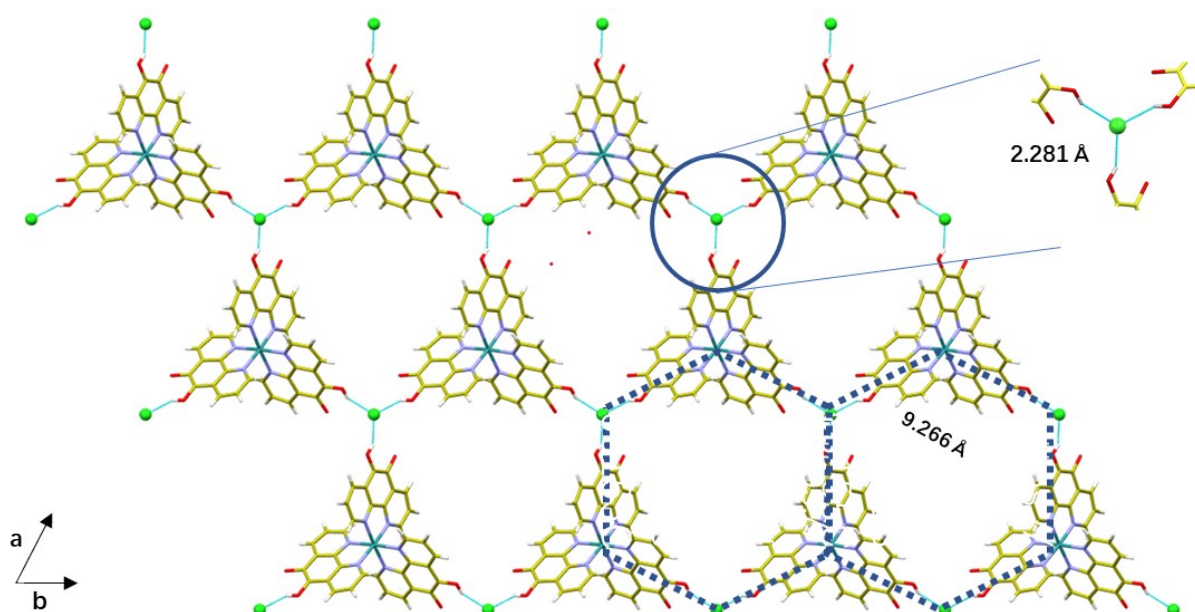

**Figure S6:** H-bond network in one layer of **1.Cl** consisting of  $[\text{Ru}(5,6\text{-dihydroxy-}1,10\text{-phenanthroline})_2(5\text{-oxido-}6\text{-hydroxy-}1,10\text{-phenanthroline})]^+$  cations and chloride anions (green sphere) highlighting hexagonal pores.

In the crystal lattice of **1.Cl**, each  $\text{Cl}^-$  ion is hydrogen bonded with one catechol hydroxyl group of three neighboring Ru-phenanthroline subunits ( $\text{O}\cdots\text{Cl}$ :  $3.043\text{ \AA}$ ,  $\text{O-H}\cdots\text{Cl}$ :  $2.281\text{ \AA}$ ,  $\angle\text{ClHO}$ :  $150.69^\circ$ ) in a trifurcated manner which extends in the  $ab$  plane. This H-bonded triad represents a nearly perfect tetrahedron where the  $\text{Cl}^-$  ions lie *ca.*  $0.63\text{ \AA}$  above the basal plane formed by three hydroxyl oxygens ( $\angle\text{OCIO} \sim 109.6^\circ$ ;  $\text{O}\cdots\text{O} \sim 4.974\text{ \AA}$ ). The average  $\text{O-H}\cdots\text{Cl}$  hydrogen bond distance is *ca.*  $76\%$  *vdW* which is in accordance with the previously reported catechol-chloride H-bonded organic frameworks. This supramolecular association extends in the  $ab$ -plane to form honeycomb (*hcb*) network with hexagonal pores consisting of Ru(II) cations and anions as corners, and aromatic phenanthroline ligands as edges (Figure 2). The large perfect hexagonal pores have edge length of *ca.*  $9.266\text{ \AA}$  ( $\text{Ru}\cdots\text{Cl}$  distance) leading to large pore window of  $\sim 223\text{ \AA}^2$  where the phenanthroline rings are out of the plane connecting Ru and Cl ions by *ca.*  $30^\circ$ .



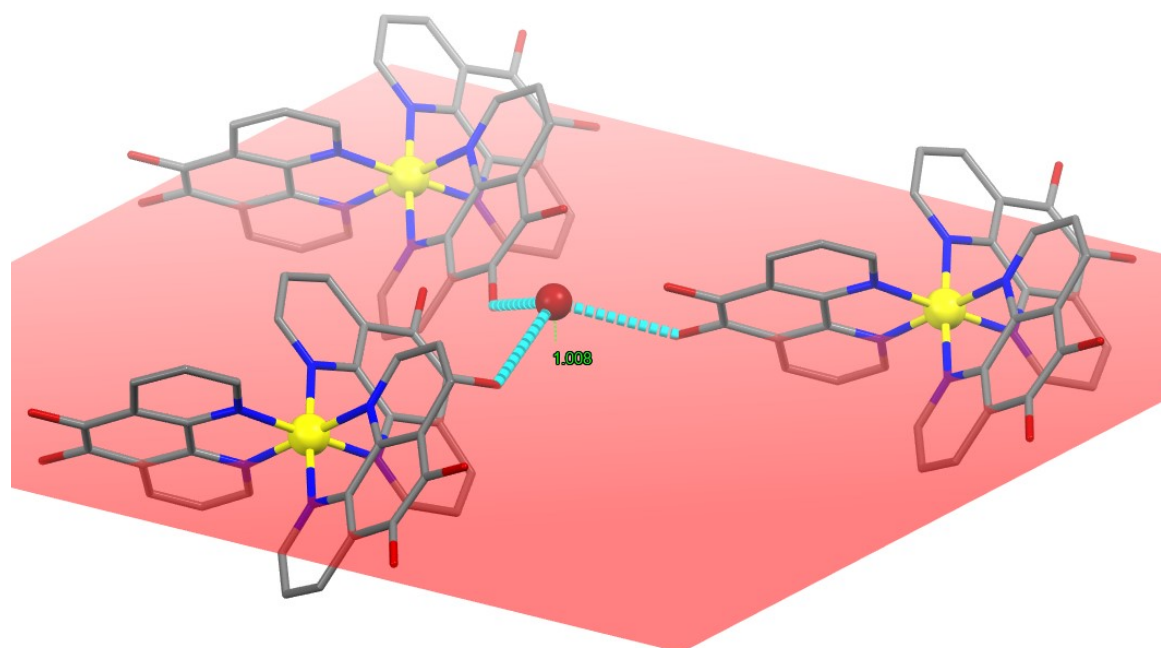

**Figure S7:** One Cl<sup>-</sup> anion holding three coordination complex units at nearly 1.008 Å above the basal plane formed by three H-bonded oxygen atoms.

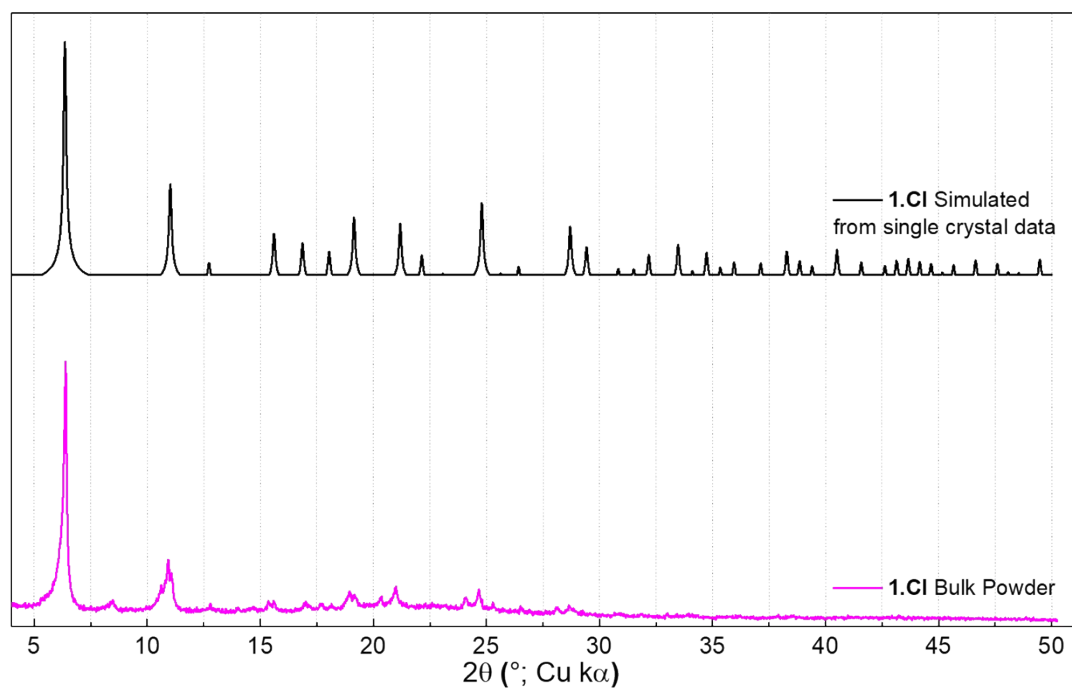

**Figure S8:** Comparison of powder XRD patterns of bulk powder of 1.CI with the corresponding simulated diffractogram from single-crystal data.

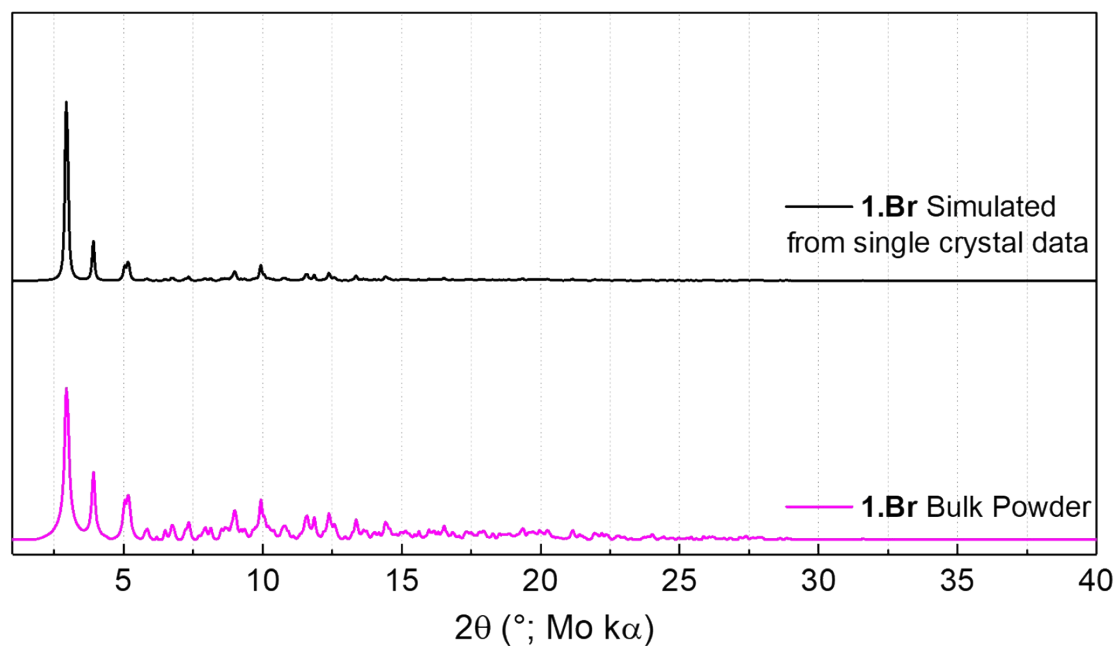

**Figure S9:** Comparison of XRD patterns of bulk powder of **1.Br** with the corresponding simulated diffractogram from single-crystal data.

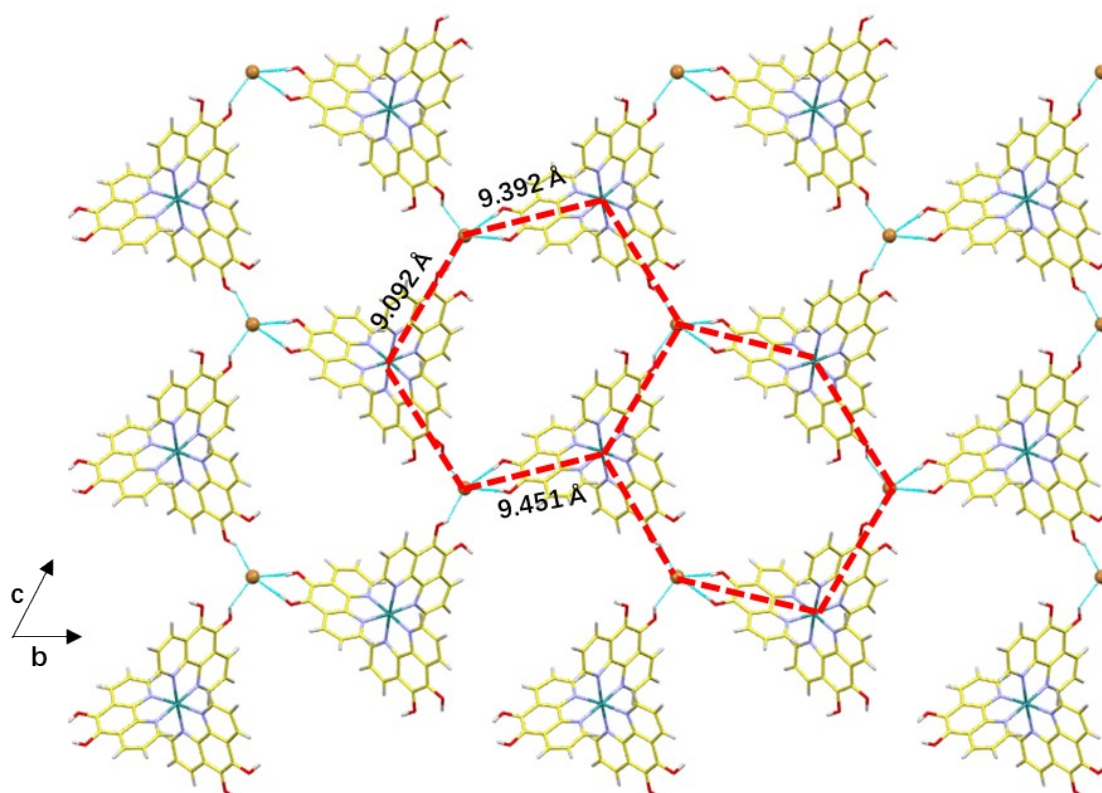

**Figure S10:** H-bond network in one layer of **1.Br** consisting of  $[\text{Ru}(5,6\text{-dihydroxy-}1,10\text{-phenanthroline})_2(5\text{-oxido-}6\text{-hydroxy-}1,10\text{-phenanthroline})]^+$  cations and bromide anions (brown spheres) highlighting distorted hexagonal pores.

$\text{Br}^-$  ions displayed similar anion-template effect in **1.Br** via weaker  $\text{O-H}\cdots\text{anion}$  interactions with four nearby hydroxyl groups from three building block units (avg.  $\text{O}\cdots\text{Br} \sim 3.127 \text{ \AA}$ , avg.  $\text{O-H}\cdots\text{Br} \sim 2.373 \text{ \AA}$ , avg.  $\angle\text{BrHO} \sim 154.46^\circ$ ) (Figure 2). In the H-bonded quadruple, one of the building blocks forms convergent hydrogen bonds to the  $\text{Br}^-$  ion through both of the hydroxyl groups. Unlike **1.Cl**, the pores are not perfectly hexagonal and rather skewed which is presumably due to higher ionic radii of  $\text{Br}^-$  ions.

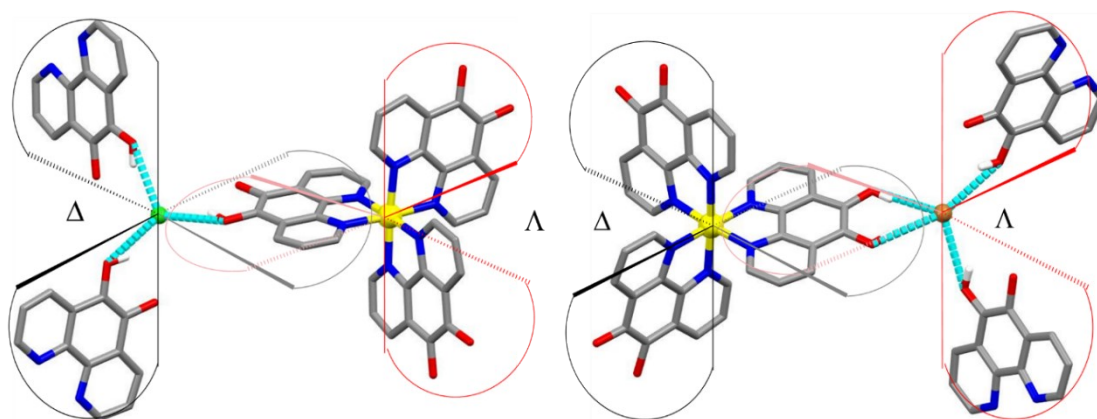

**Figure S11:** Stereochemistry around the Ru(II) cation in the complex and anions in **1.Cl** (left) and **1.Br** (right).

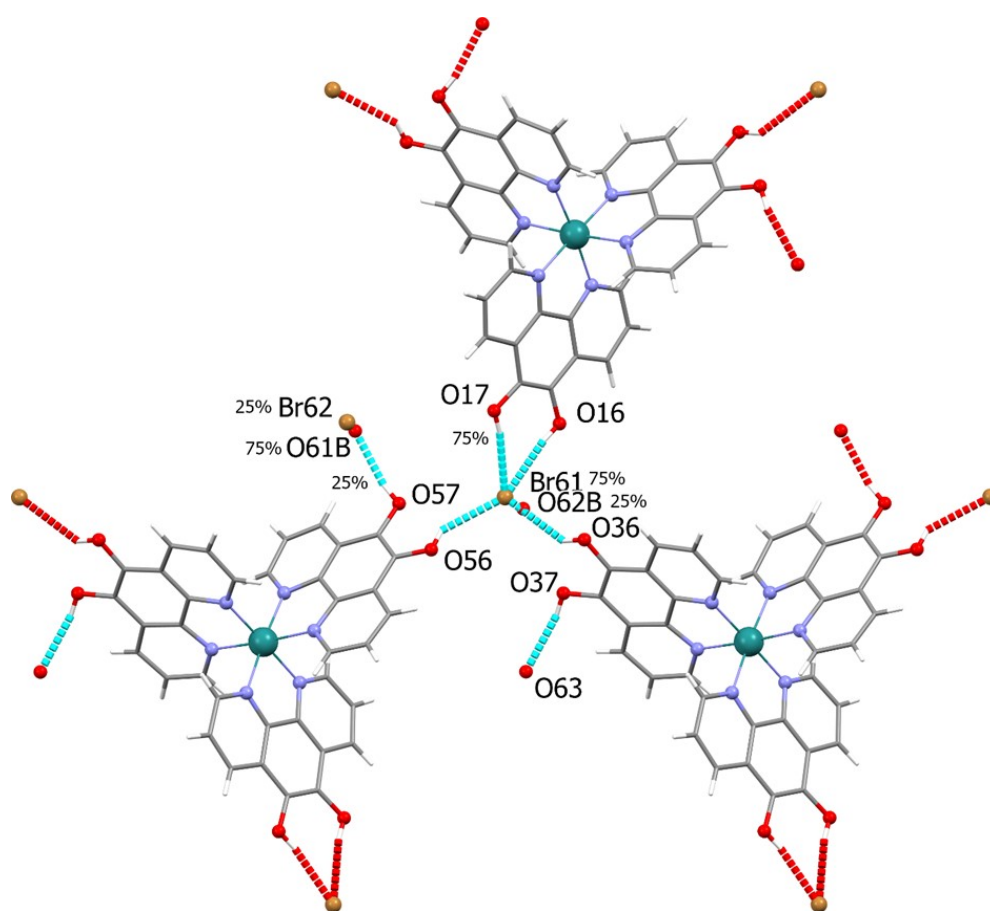

**Figure S12:** Hydrogen bond interactions involving the Br (Br61/Br62) anions and water molecules (O61B/O62B and O63), the occupancies are indicated.

In **1.Br**, a similar cation-complex/anion ratio was found, although the Bromide anion was found to be disordered over two separate sites existing roughly in the ratio of 75/25, the vacant space is occupied by a disordered water molecule in the reversed ratio (25/75). The major Bromide site interacts with three phenanthroline ligands from neighboring complex. i.e. either the bromide or water molecule is involved in a hydrogen bond with one of the OH groups (O16, O36, O56). The OH (O37) is engaged in a full H-bond with the fully occupied lattice water molecule O63. This means the negative charge is distributed over O17 and O57. The hydrogen atoms on those oxygen atoms also hydrogen bond to the bromide atoms. This results in a 75% occupancy for H17 interacting with Bromide Br61 (at 75% occupancy) and a 25% occupancy for H57 interacting with Br62 (at 25% occupancy); leaving a net negative charge of  $-3/4$  on O57 and  $-1/4$  on O17.

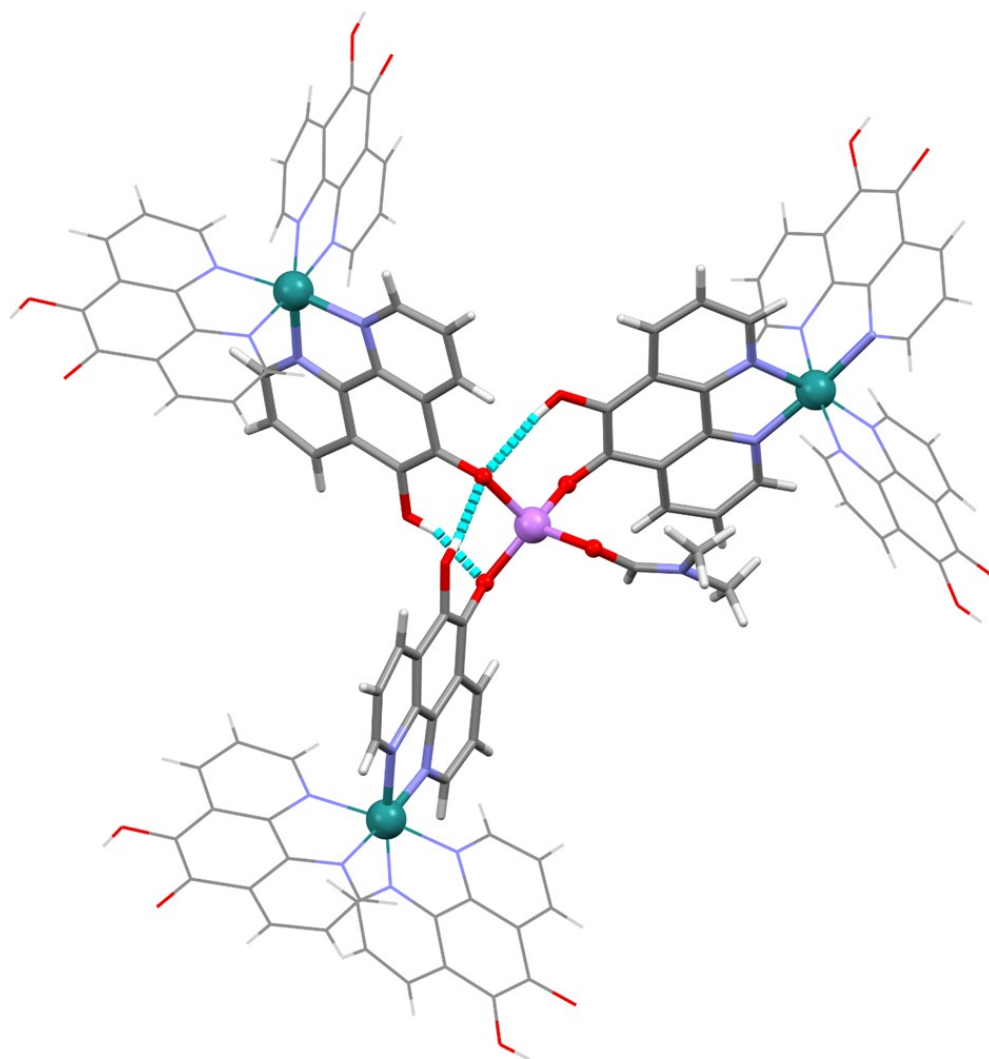

**Figure S13:** Tetragonal geometry around Li (purple) in **1.Li** involving three C-O groups and one DMF molecule. The OH groups are hydrogen bonded to neighboring C-O groups.

For **1.Li** the charge distribution is more straightforward, the total positive charge comprises of 1 Ru(II) and 1 Li(I) and is compensated by a negative charge on every phenanthroline ligand. Every Li cation is in a tetragonal configuration with 3 phenanthroline ligands, through the C-O<sup>-</sup>, and 1 oxygen atom of a DMF solvent molecule. The OH groups hydrogen bond to neighboring C-O<sup>-</sup> oxygen atoms.

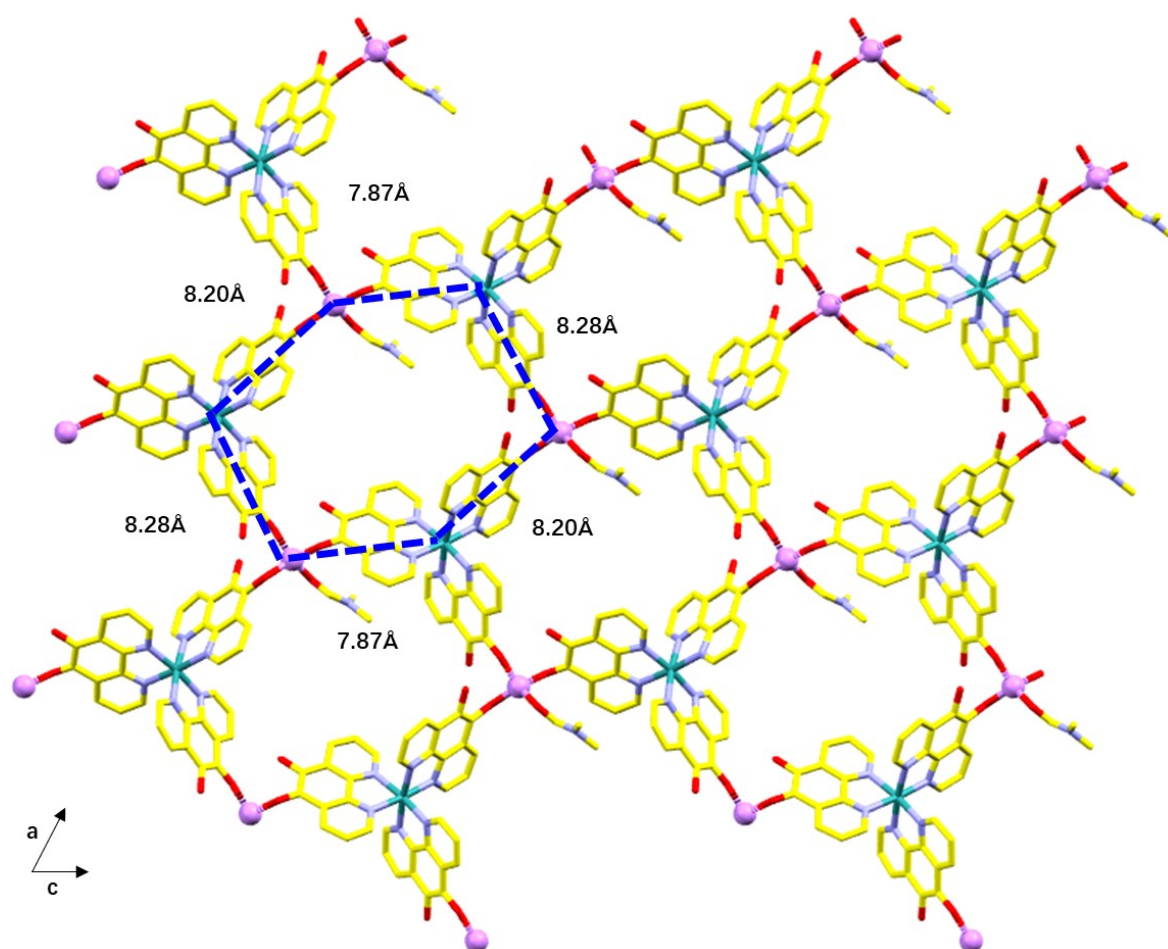

**Figure S14:** H-bond network in one layer of **1.Li** consisting of [Ru(5-oxido-6-hydroxy-1,10-phenanthroline)<sub>3</sub>] anion and Li<sup>+</sup> cations (pink spheres) highlighting distorted hexagonal pores.



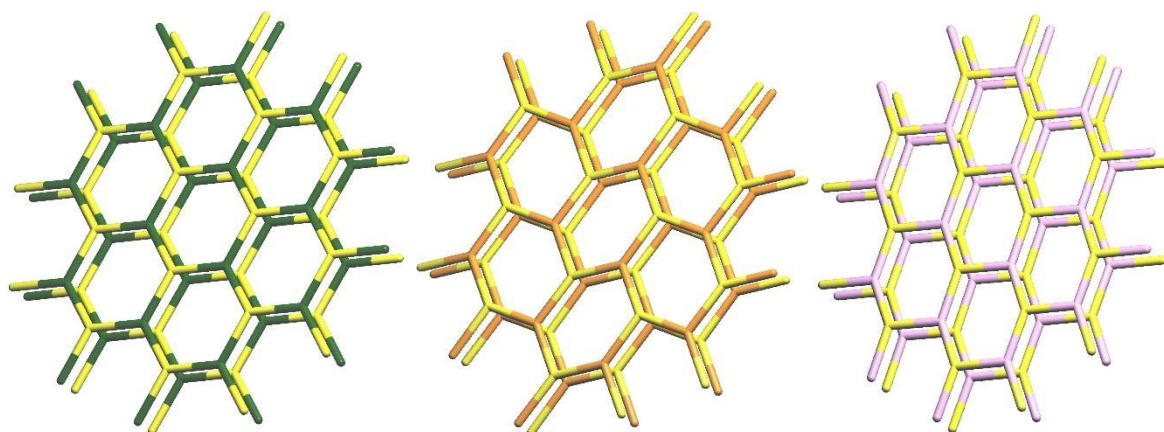

**Figure S15:** A topological stack of two 2D layers showing hexagonal ( $6^3$ ) net of **1.Cl** (left), **1.Br** (center) and **1.Li** (right).

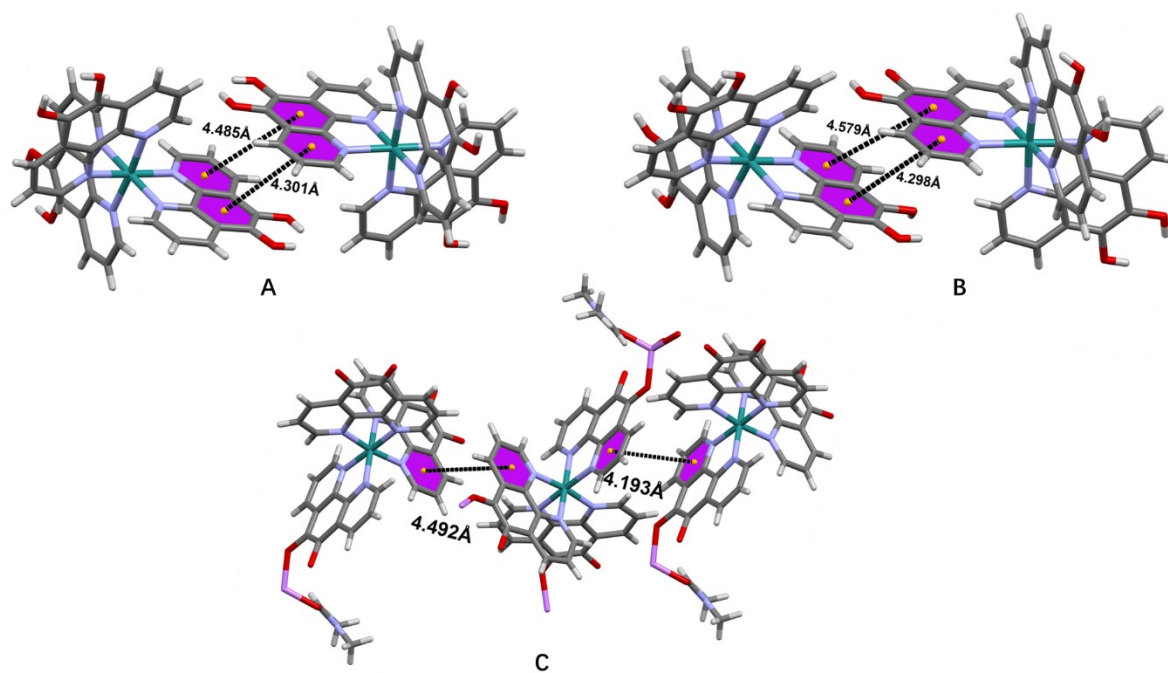

**Figure S16:** Aromatic stacking interactions between adjacent molecules of **1.Cl** (A), **1.Br** (B) and **1.Li** (C).

## Thermal stability of 1.Cl and 1.Br

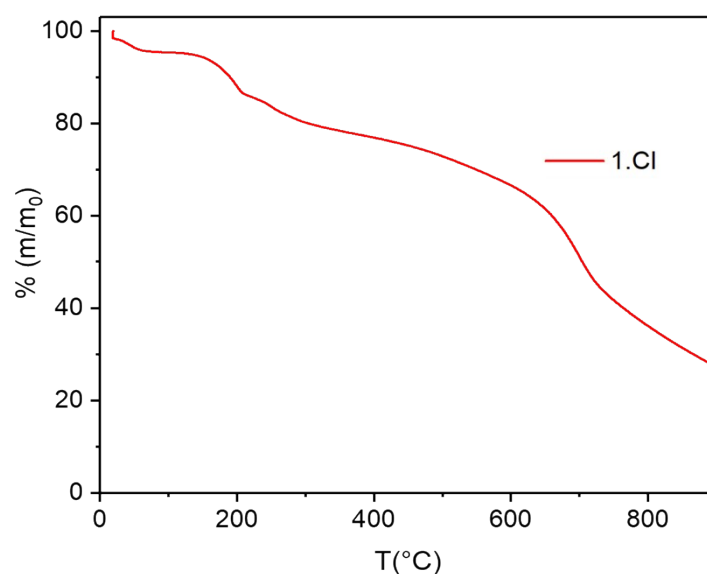

**Figure S17:** Thermogravimetric (TGA) profile showing the decomposition of **1.Cl** in the temperature range from 20°C to 900°C.

A 4.55% loss at an average temperature of 40°C is observed and 9.75% of loss appears at a 150°C temperature average. The loss refers to a complete removal of residual ethanol and diethylether (residual low boiling solvents stuck in the network), as well as H<sub>2</sub>O molecules\*. A clear plateau between the first two losses suggests that two well distinct solvent removal or other processes appear successively one after another. A 7.86% of mass weight was lost at an average of 250°C temperature. After 300°C, the decomposition of the complex gradually occurs until the end of the analysis at 900°C.

*\* Important to note, the conditions of measurements of such an analysis requires a very short exposure to air to transfer the sample in the machine. This inevitably provokes the adsorption of few H<sub>2</sub>O molecules, also responsible for the early weight loss below 100°C.*

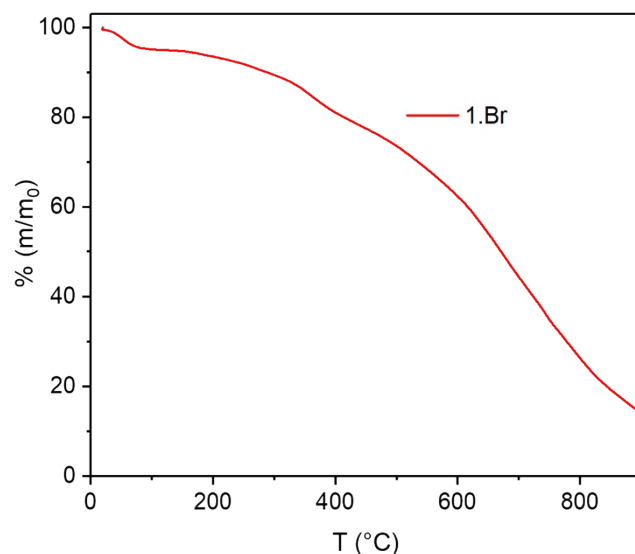

**Figure S18:** Thermogravimetric (TGA) profile showing the decomposition of **1.Br** in the temperature range from 20°C to 900°C.

A loss of 5.07% at 60°C was observed, corresponding to a complete removal of residual ethanol and diethylether molecules (and H<sub>2</sub>O molecules given that sample are inevitably exposed to ambient air before loading in the TGA machine). A plateau is then observed until 175°C which is showing the thermal stability of the complex. After, the decomposition of the complex occurs from 200°C to 900°C with a rather constant slope.

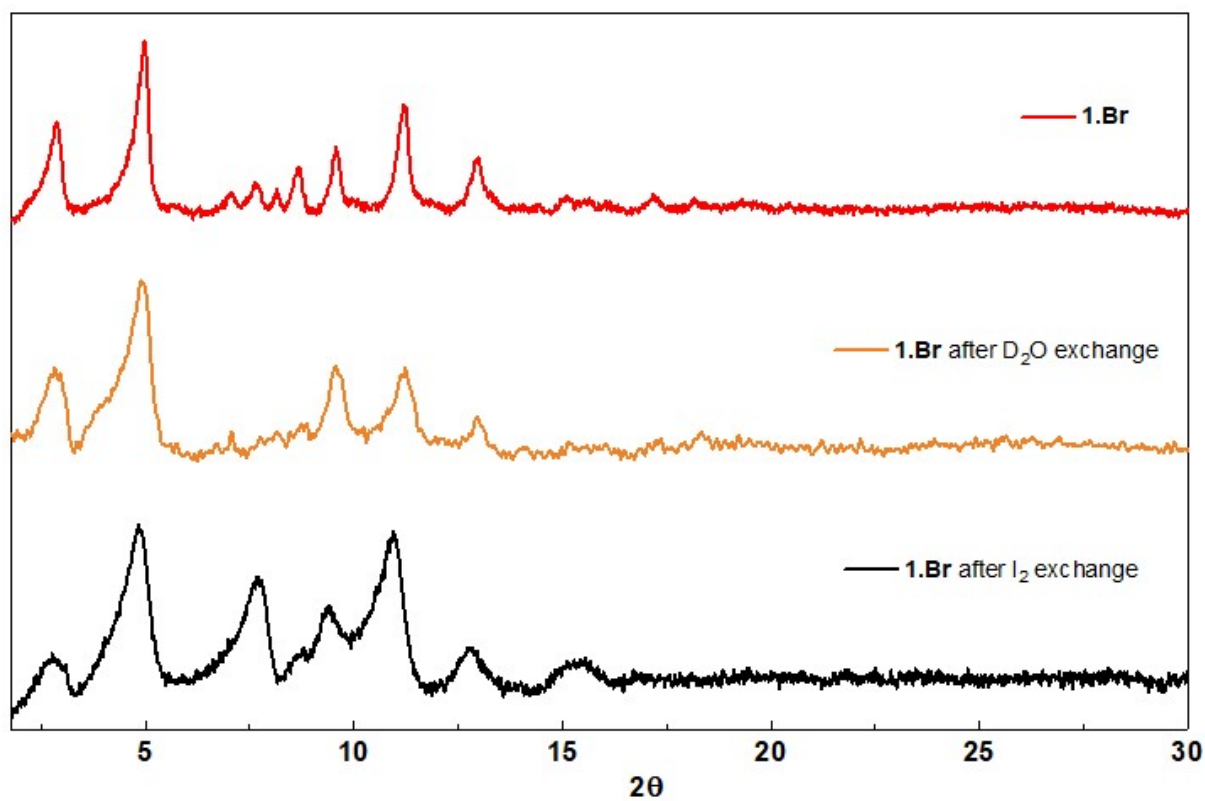

**Figure S19:** Comparative PXRD patterns of **1.Br** (red), after  $D_2O$  exchange (orange) and after iodine exchange (black).

## SI-References:

1. Wendlandt, A. E., Stahl, S. S., *J. Am. Chem. Soc.*, **2014**, 136, 34, 11910-11913.
2. Paw, W., and Eisenberg, R., Synthesis, Characterization and Spectroscopy of Dipyrrocatecholate Complexes of Platinum, *Inorg. Chem.*, 1997, **36**, 2287-2293.
3. Lakraychi, A. E., *et al.*, Phendione–Transition-Metal Complexes with Bipolar Redox Activity for Lithium Batteries, *ChemSusChem*, 2020,**13**, 9, 2225-2231.
4. Halis, S., Inge, A. K., Dehning, N., Weyrich, T., Reinsch, H., & Stock, N., Dihydroxybenzoquinone as Linker for the Synthesis of Permanently Porous Aluminum Metal–Organic Frameworks, *Inorganic Chemistry*, 2016, **55**, 15, 7425-7431
5. Raj, J. G. J., Pathak, D. D., & Kapoor, P. N. (2013). Multi-Nuclear NMR Investigation of Nickel (II), Palladium (II), Platinum (II) and Ruthenium (II) Complexes of an Asymmetrical Ditertiary Phosphine. *Journal of the Korean Chemical Society*, 2013, **57**, 6, 726-730.
6. CrysAlisPro, version 1.171.33.49b, Oxford Diffraction Ltd., Abingdon, UK, **2009**.
7. Sheldrick, G. M., SHELXT - Integrated space-group and crystal-structure determination. *Acta Crystallographica Section A: Foundations of Crystallography*, 2015, **71**, 3–8.
8. Sheldrick, G. M., Crystal structure refinement with SHELXL. *Acta Crystallographica Section C: Structural Chemistry*, 2015, **71**, 3–8.
9. Spek, A. L. Structure validation in chemical crystallography. *Acta Crystallogr.* 2009, **D65**, 148–155.
